# Supplementary material for: STK25 suppresses Hippo signaling by regulating SAV1-STRIPAK antagonism
Source: eLife journal article supplement (doi:10.7554/elife.54863), 2020-04-15
Supplement: supp [file elife_poa_e54863_Figure_4_figure_supplement_2.pdf › elife_poa_e54863_Figure_4_figure_supplement_2.pdf]

STK25 gDNA : GCCTTACGAATCGGGGGTCTTTGTTGAAGCAGGCCT  
CGGAATGCTTAGCCCCCAGAAACAACCTTCGTCCGGA  
sgRNA PAM

KO Clone : GCCTTACGAATCGGGGGTCTTTGTTTGAAGCAGGCCT

MST3 gDNA : CAACAT**AATACTTACTAGATCTAGTGGG**AGCCTC  
GTTGTAT**TTATGAATGATCTAGATCACGCCT**CGGAG

sgRNA PAM

KO Clone : CAACAT**AATACTTACTAGATCT**---**GCGG**AGCCTC

MST4 gDNA : GGAGAGCCACCTAACTCCGATATGCATCCAATGAGAG  
CCTCTCGGTGGATTGAGGCTATACGTAGGTTACTCTC  
PAM sgRNA

KO Clone : GGAGAAAGCCACCTAACTCCGATATGCATCCAATGAGAG

MST1 gDNA :           AGAAAAATACCCGAGATATCAAGGCAGGAAATAT  
TCTTTTATGTGGCTCTATAGTTCCGTCCTTTATA

sgRNA                  PAM

KO Clone :           AGAAAAATACCCGAGATATC-AGGCAGGAAATAT

MST2 gDNA : AGCGCCACAGTACTCCATAACAATCCAGAGGTCTGTG  
TCGCGGTGTCATGAGGTATTGTTAGGTCTCCAGACAT  
sgRNA PAM

KO Clone : AGC-----AGTACTCCATAACAATCCAAGAGGTCTGTG

SAV1 gDNA :           TGACAGGAGGTGGTTGATCATACCGAGGTACACT  
                       ACTGTCCTCCACCAACTAGTATGGCTCCATGTGA

────────── sgRNA ────────── PAM ──────────

KO Clone :           TGACAGGAGG-----ATCATACCGAGGTACACT

### Figure 4-figure supplement 2
