# Supplementary figures and images for: STK25 suppresses Hippo signaling by regulating SAV1-STRIPAK antagonism
Source: eLife journal article supplement (doi:10.7554/elife.54863), 2020-04-15

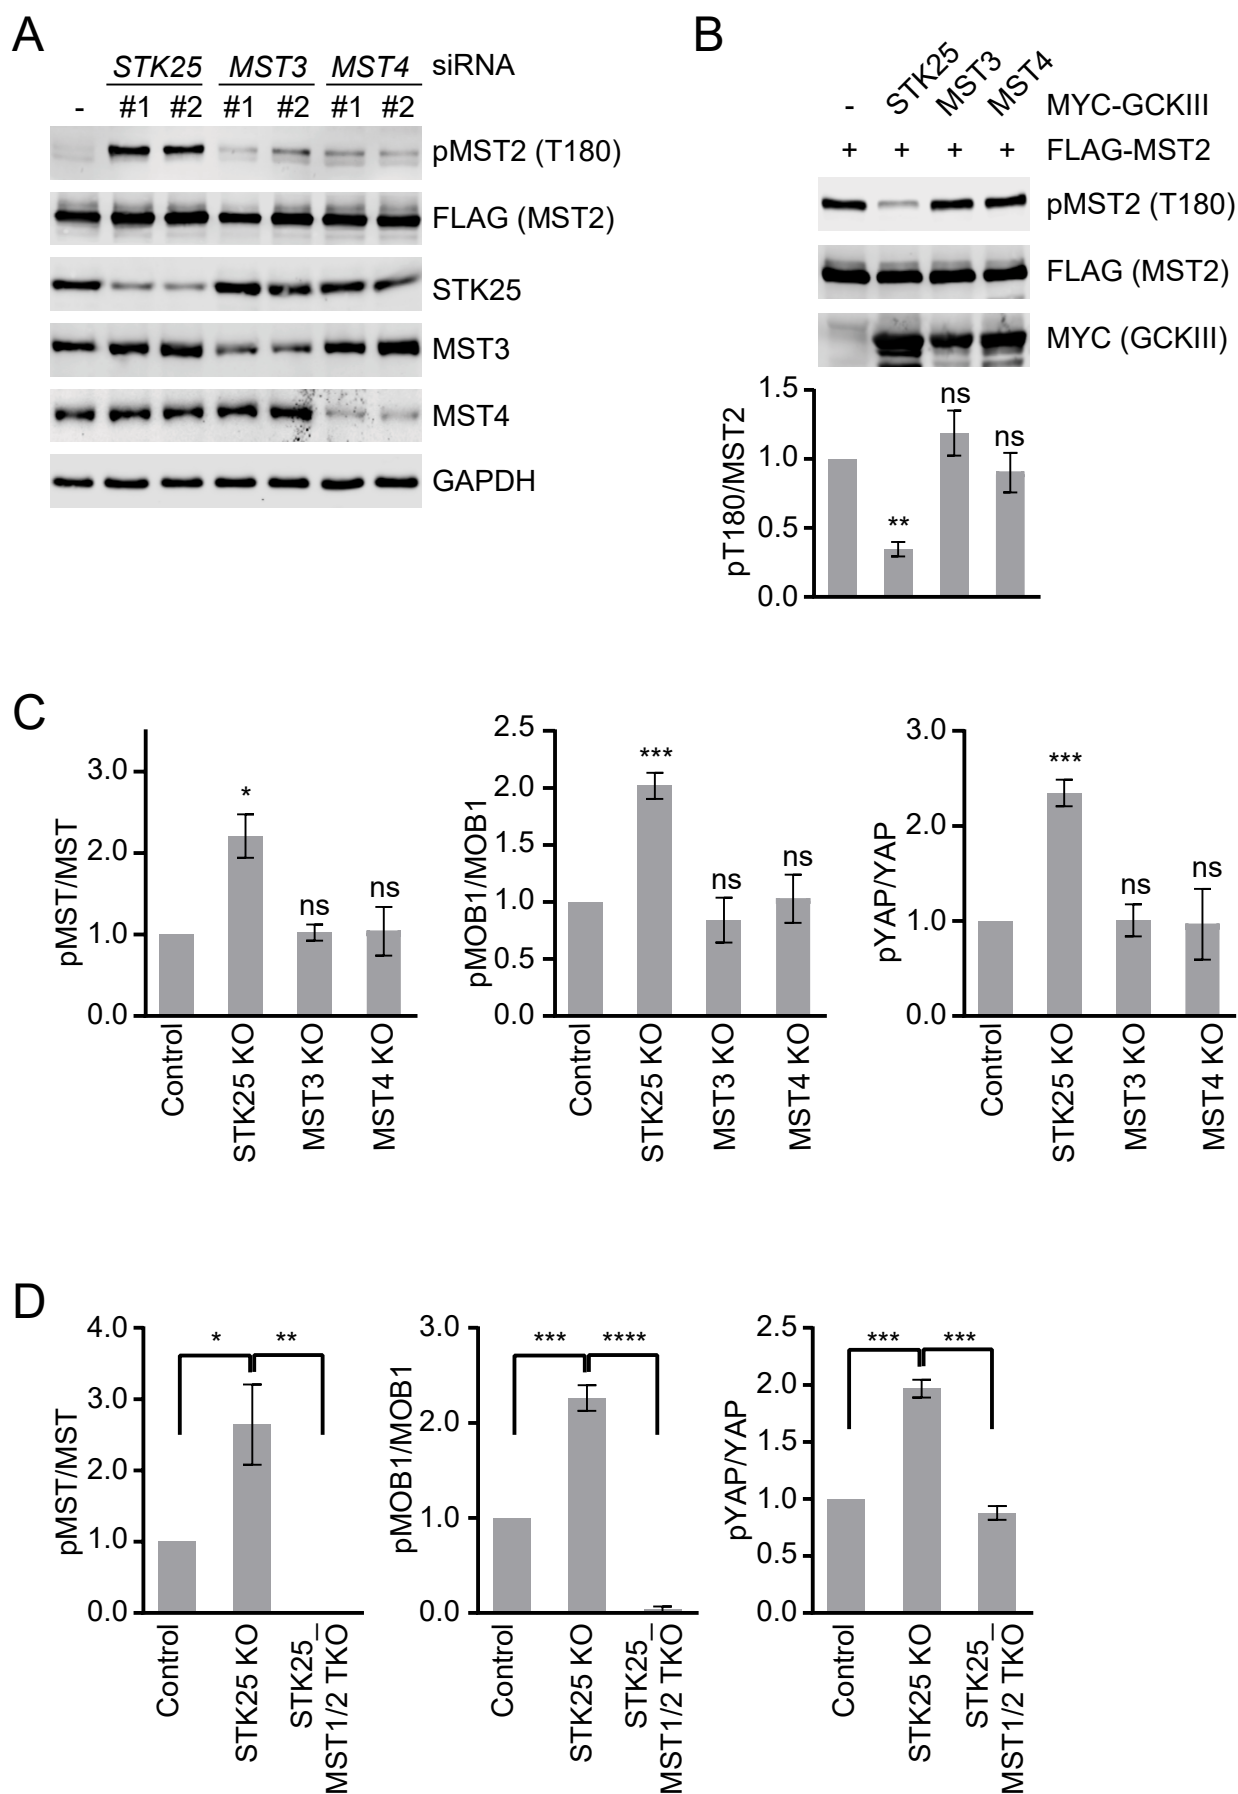

**Figure 1-figure supplement 1**

Supplement: supp [file elife_poa_e54863_Figure_1_figure_supplement_1.pdf › elife_poa_e54863_Figure_1_figure_supplement_1.pdf]

**A**

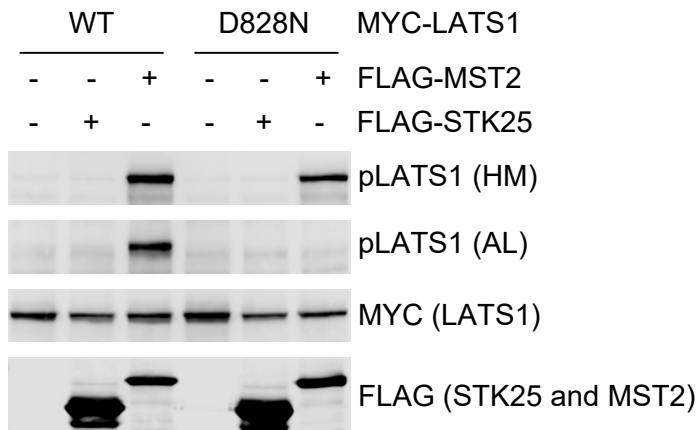

**B**

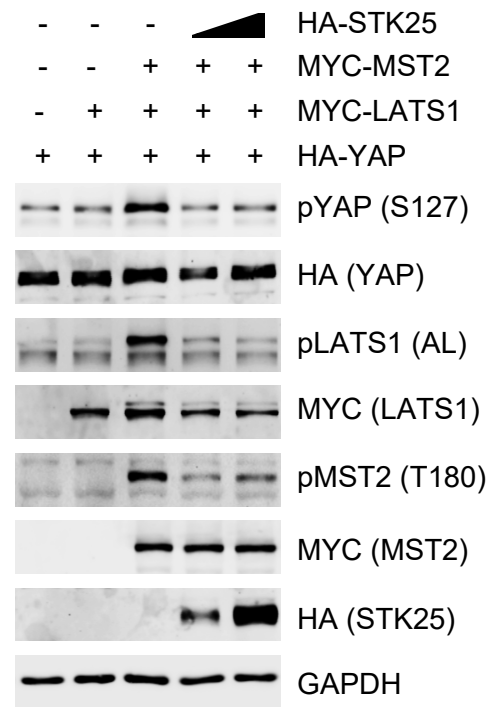

**C**

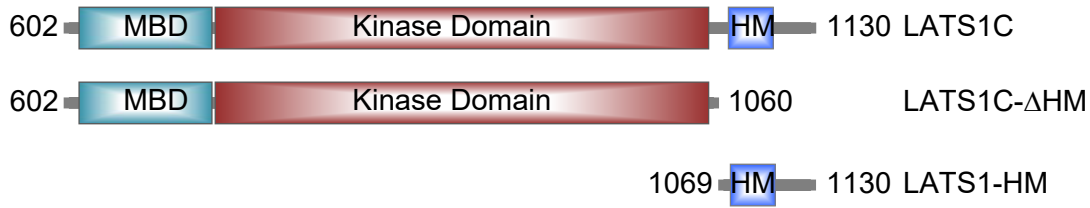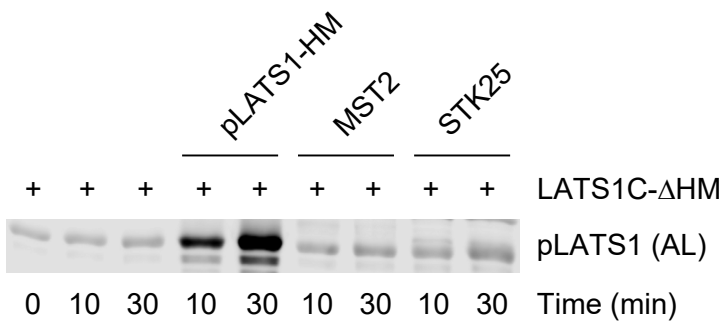

**Figure 1-figure supplement 2**

Supplement: supp [file elife_poa_e54863_Figure_1_figure_supplement_2.pdf › elife_poa_e54863_Figure_1_figure_supplement_2.pdf]

**A**

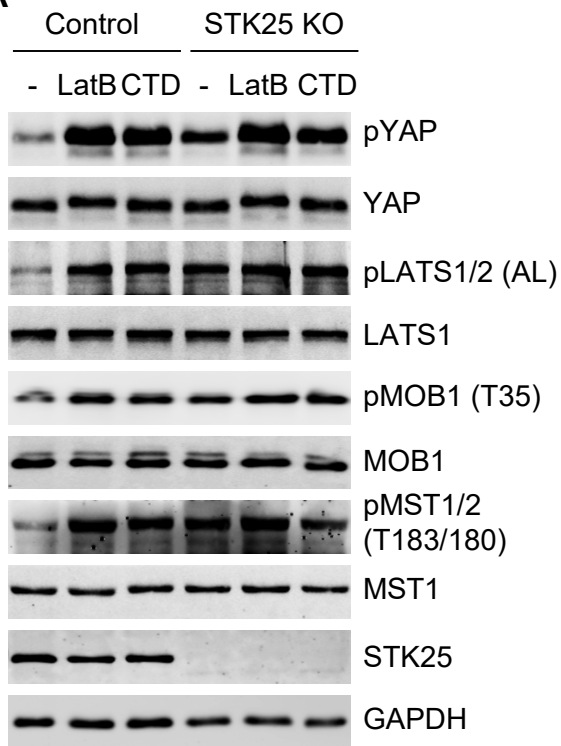

**B**

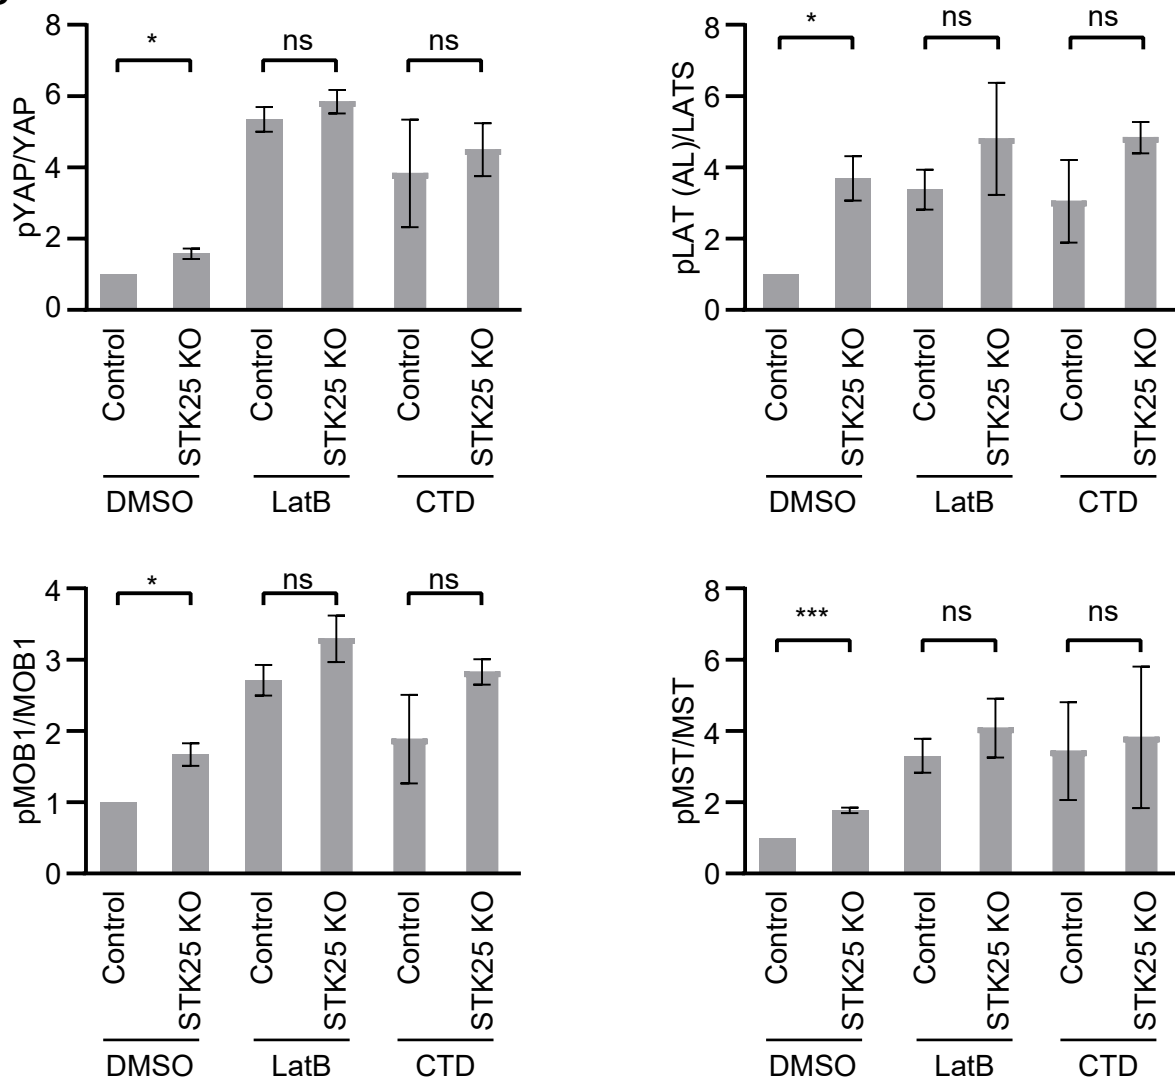

**Figure 1-figure supplement 3**

Supplement: supp [file elife_poa_e54863_Figure_1_figure_supplement_3.pdf › elife_poa_e54863_Figure_1_figure_supplement_3.pdf]

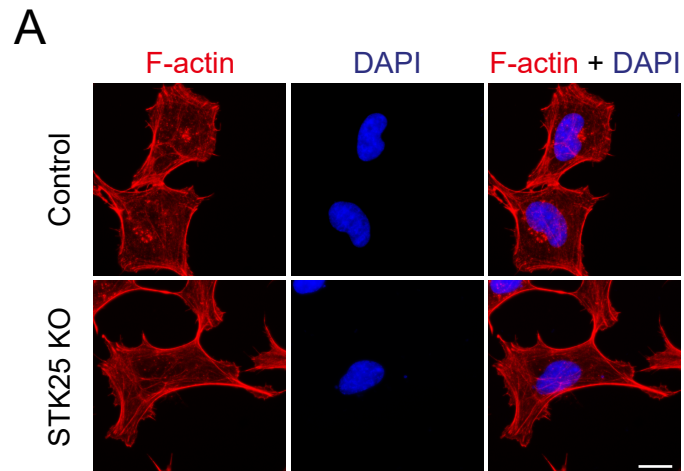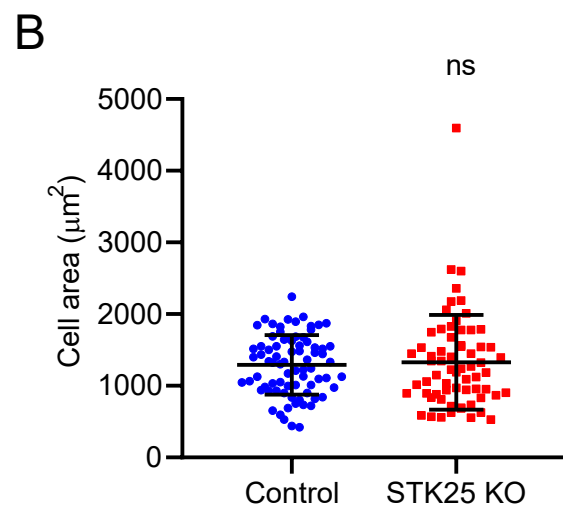

**Figure 1-figure supplement 4**

Supplement: supp [file elife_poa_e54863_Figure_1_figure_supplement_4.pdf › elife_poa_e54863_Figure_1_figure_supplement_4.pdf]

**A**

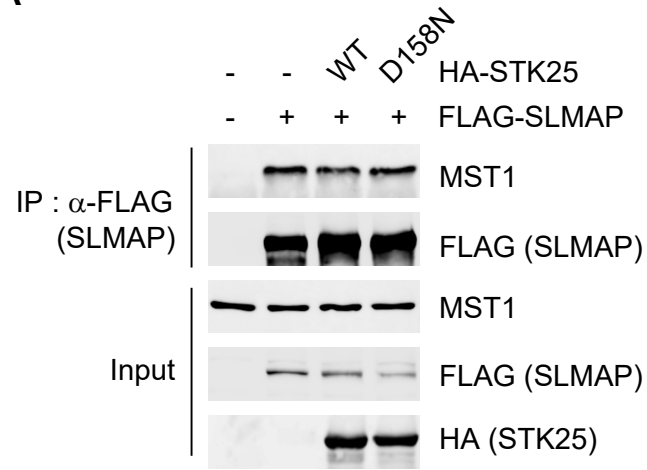

**B**

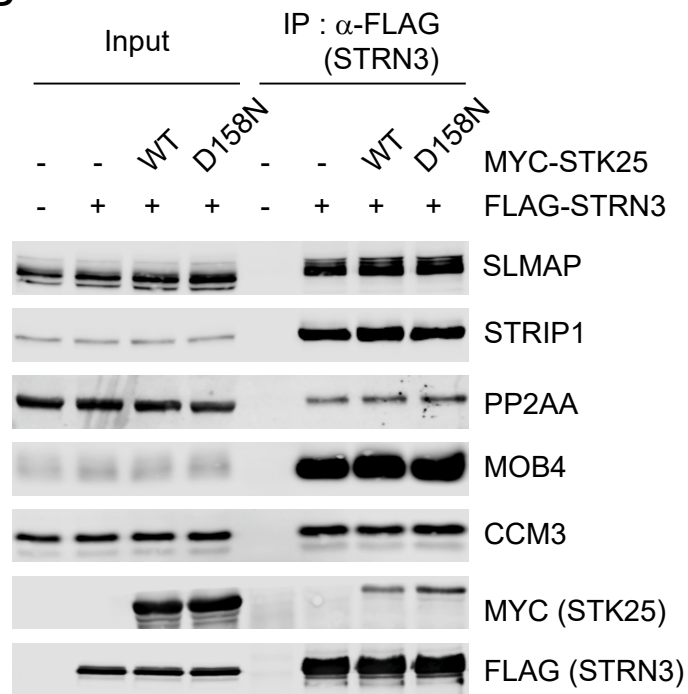

**Figure 2-figure supplement 1**

Supplement: supp [file elife_poa_e54863_Figure_2_figure_supplement_1.pdf › elife_poa_e54863_Figure_2_figure_supplement_1.pdf]

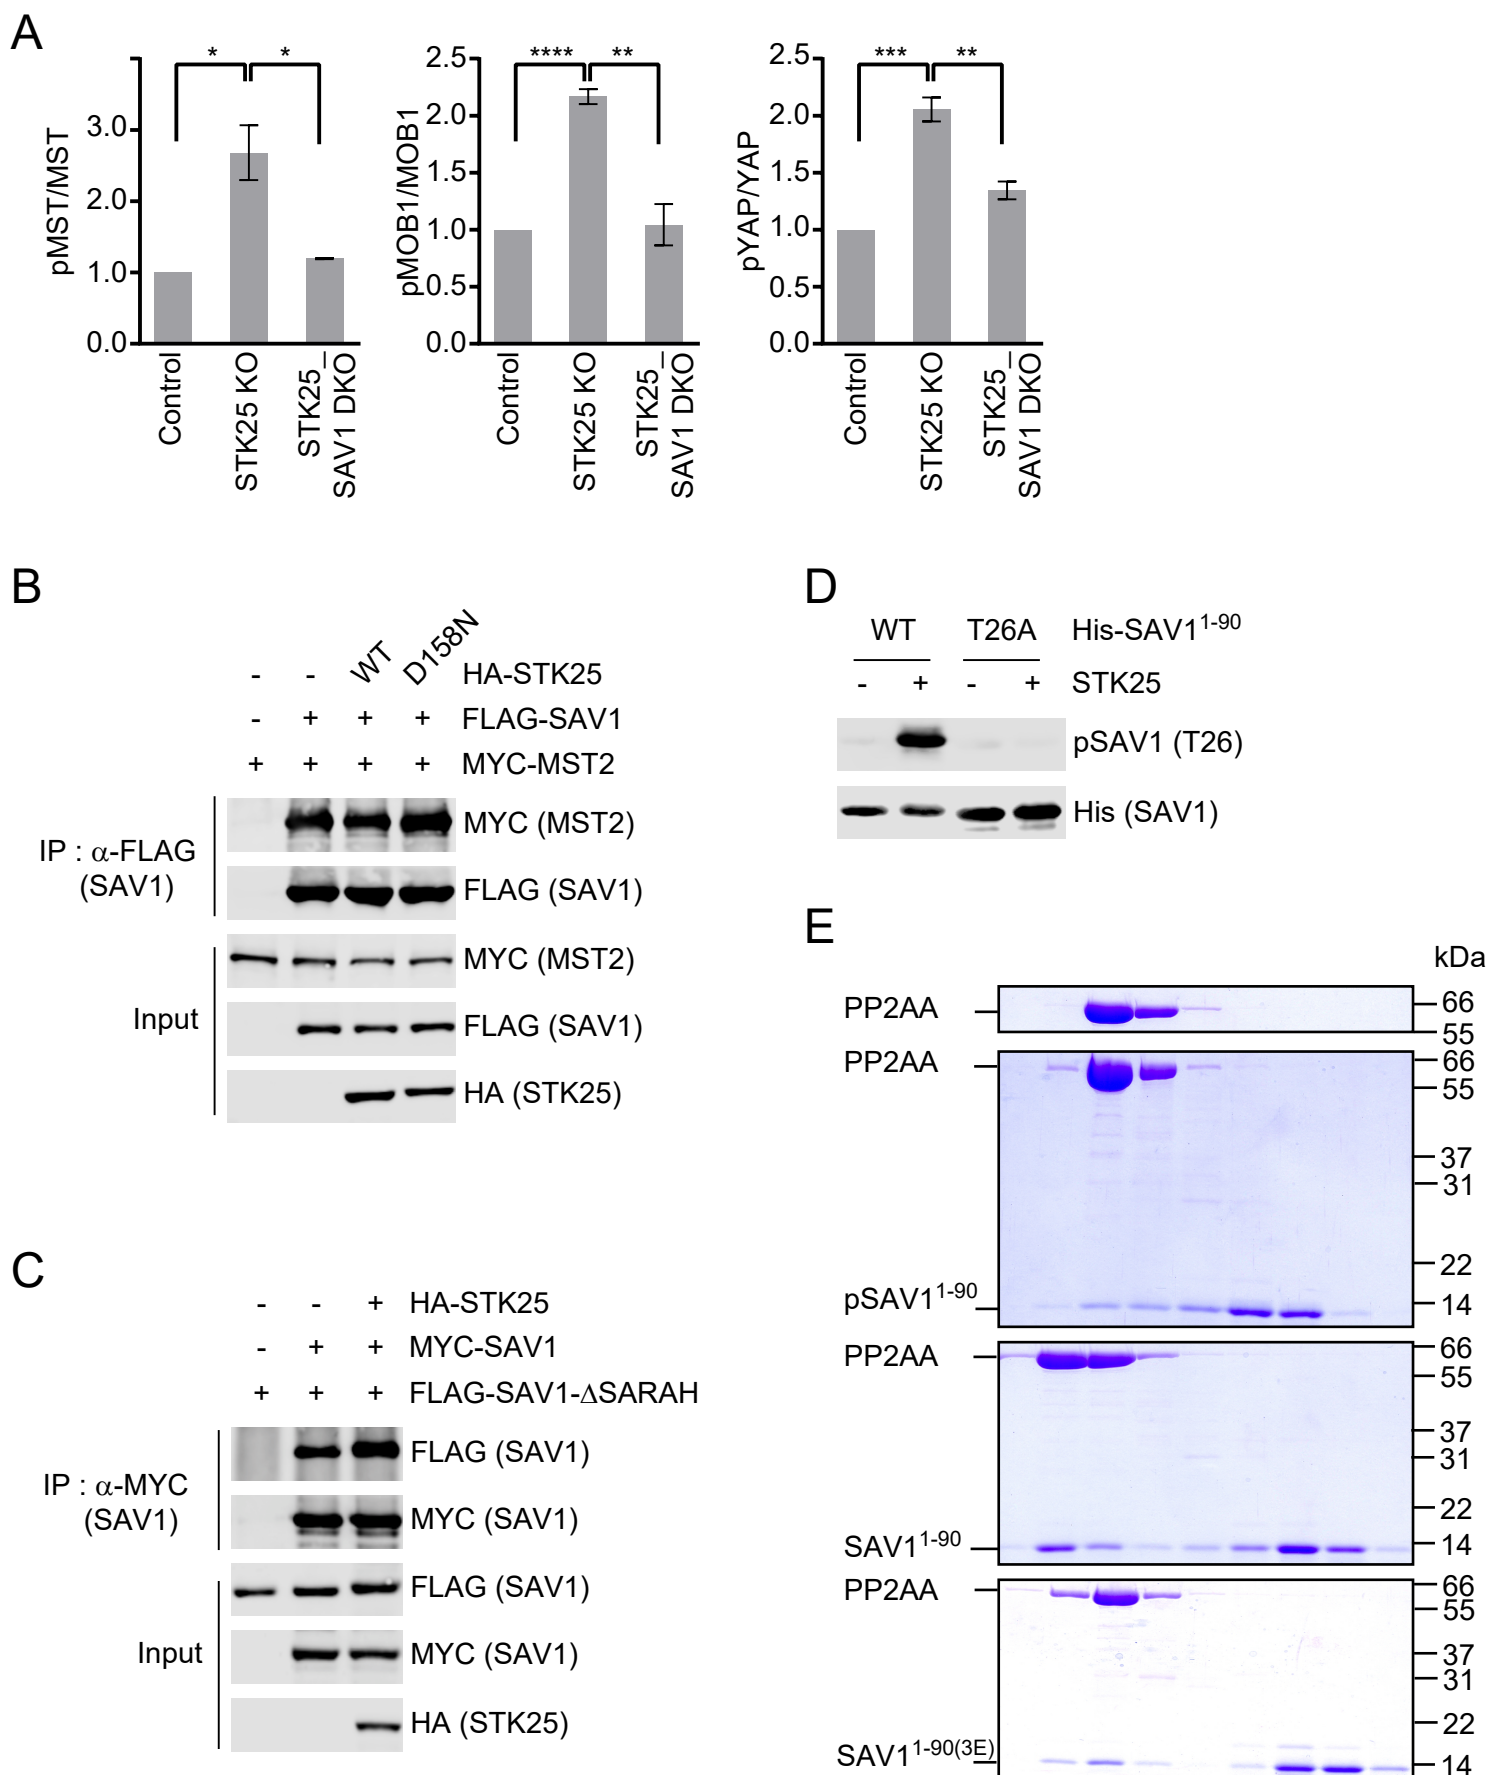

**Figure 3-figure supplement 1**

Supplement: supp [file elife_poa_e54863_Figure_3_figure_supplement_1.pdf › elife_poa_e54863_Figure_3_figure_supplement_1.pdf]

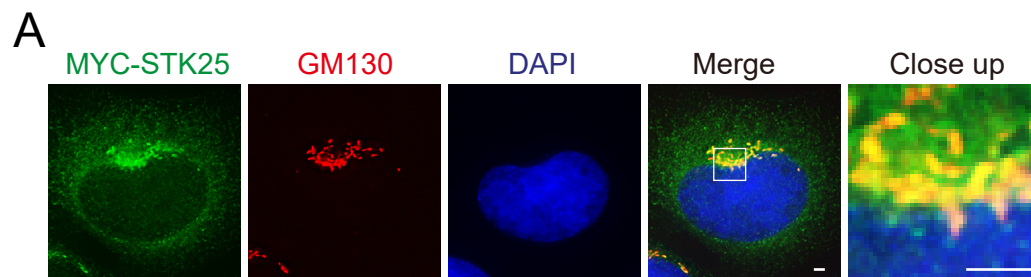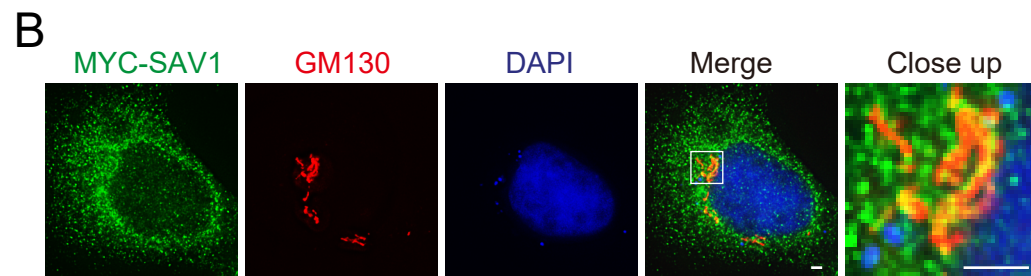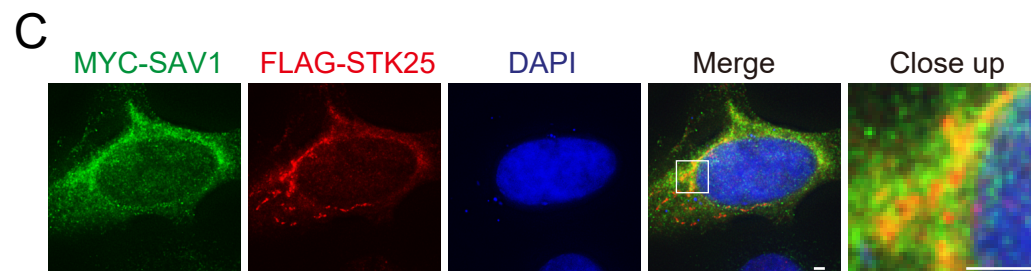

**Figure 3-figure supplement 2**

Supplement: supp [file elife_poa_e54863_Figure_3_figure_supplement_2.pdf › elife_poa_e54863_Figure_3_figure_supplement_2.pdf]

**A**

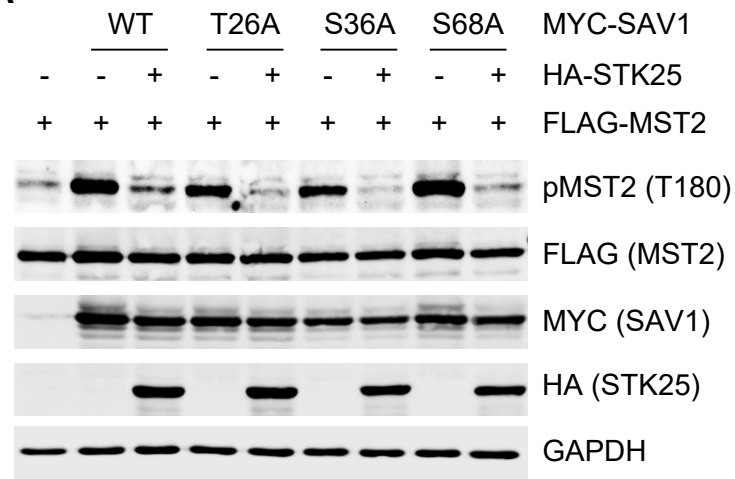

**B**

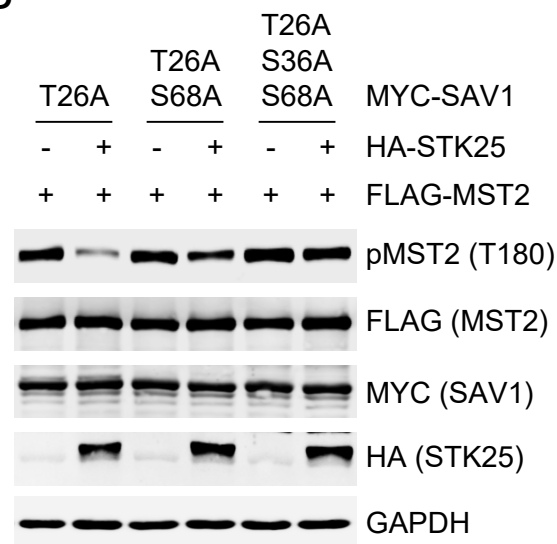

**Figure 4-figure supplement 1**

Supplement: supp [file elife_poa_e54863_Figure_4_figure_supplement_1.pdf › elife_poa_e54863_Figure_4_figure_supplement_1.pdf]
